# Supplementary material for: Genetic deletion of fibroblast growth factor 14 recapitulates phenotypic alterations underlying cognitive impairment associated with schizophrenia
Source: PubMed Central journal article supplement (PMC5070049; doi:10.1038/tp.2016.66), 2016-05-10

**A**

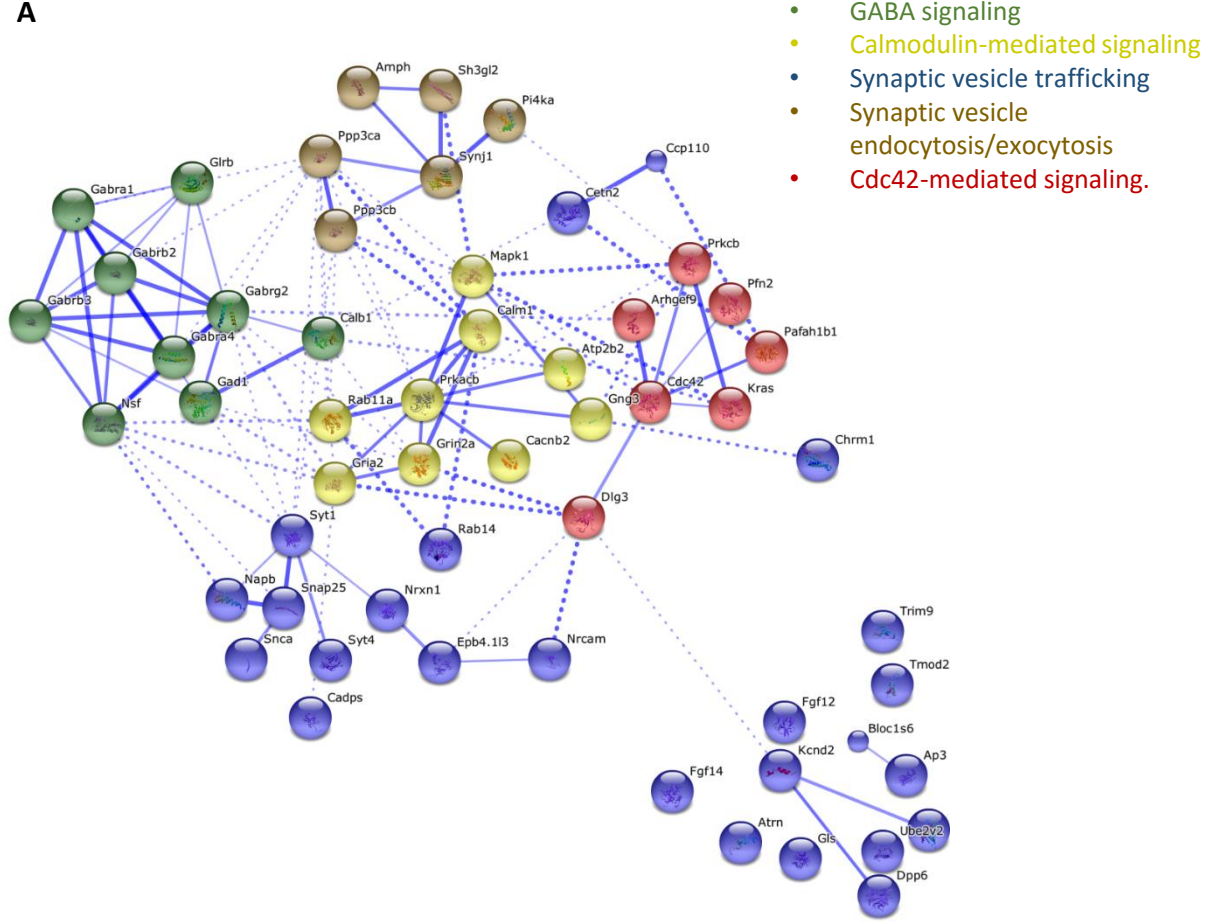

**B**

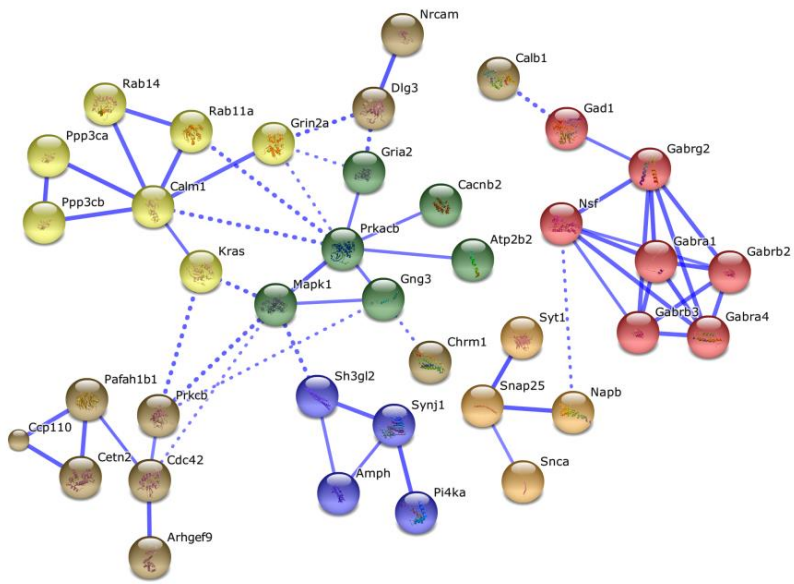

Supplement: tp201666x8.pdf [file tp201666x8.pdf]
